# Supplementary material
Source: PubMed Central journal article supplement (PMC2948526)

Supplement figure 1.  
HFFF (48h)

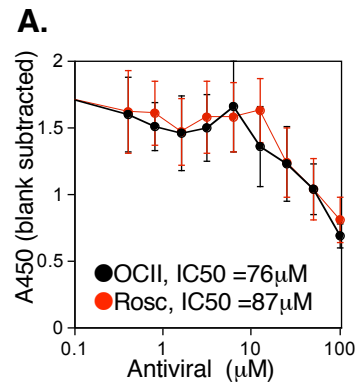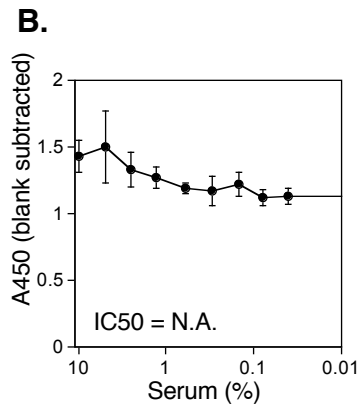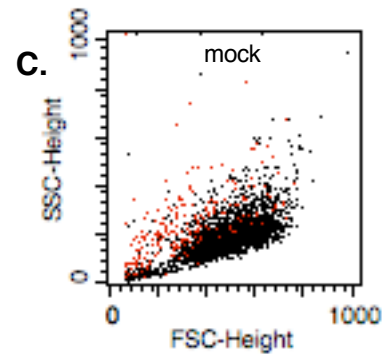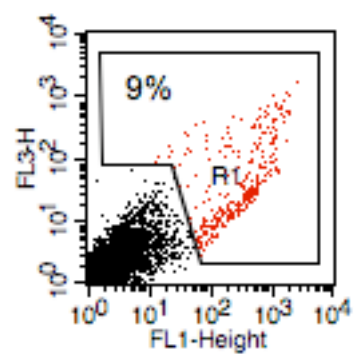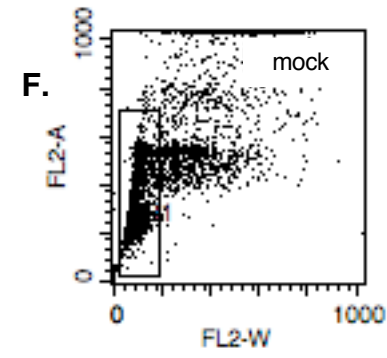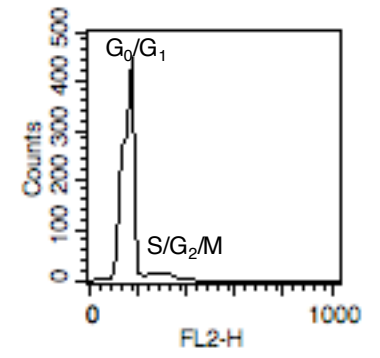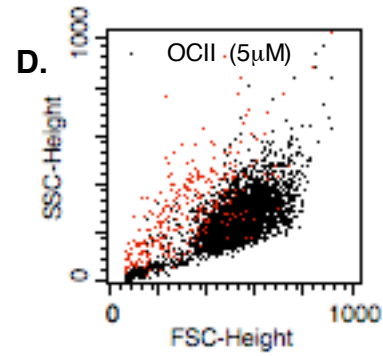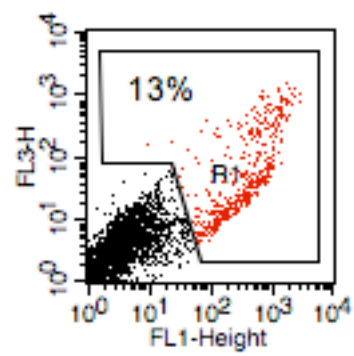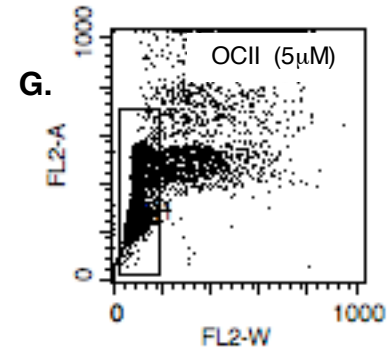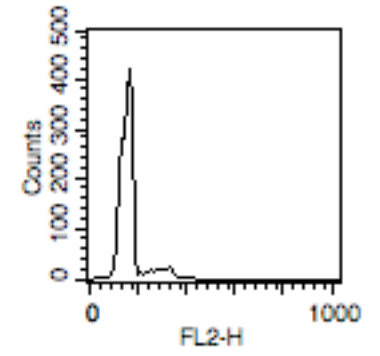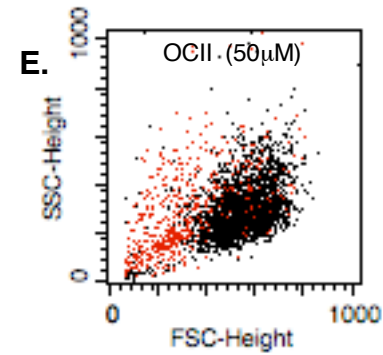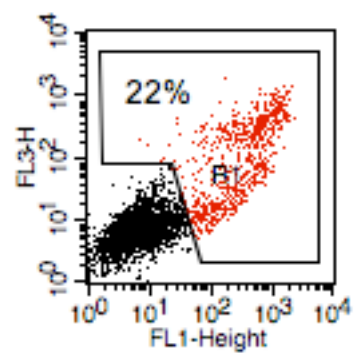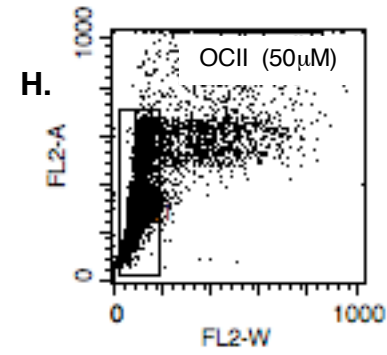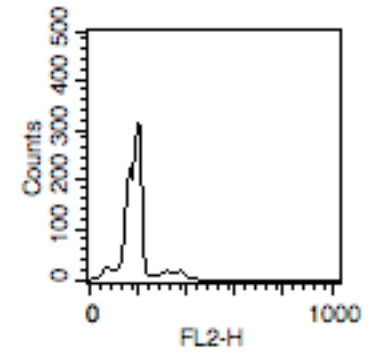

Supplement figure 2.  
HFFF (96h)

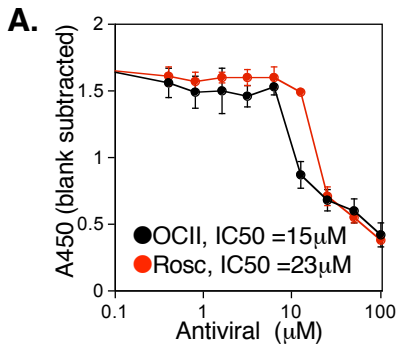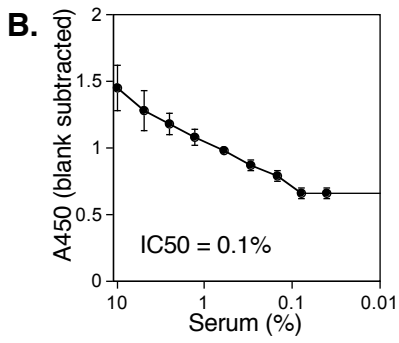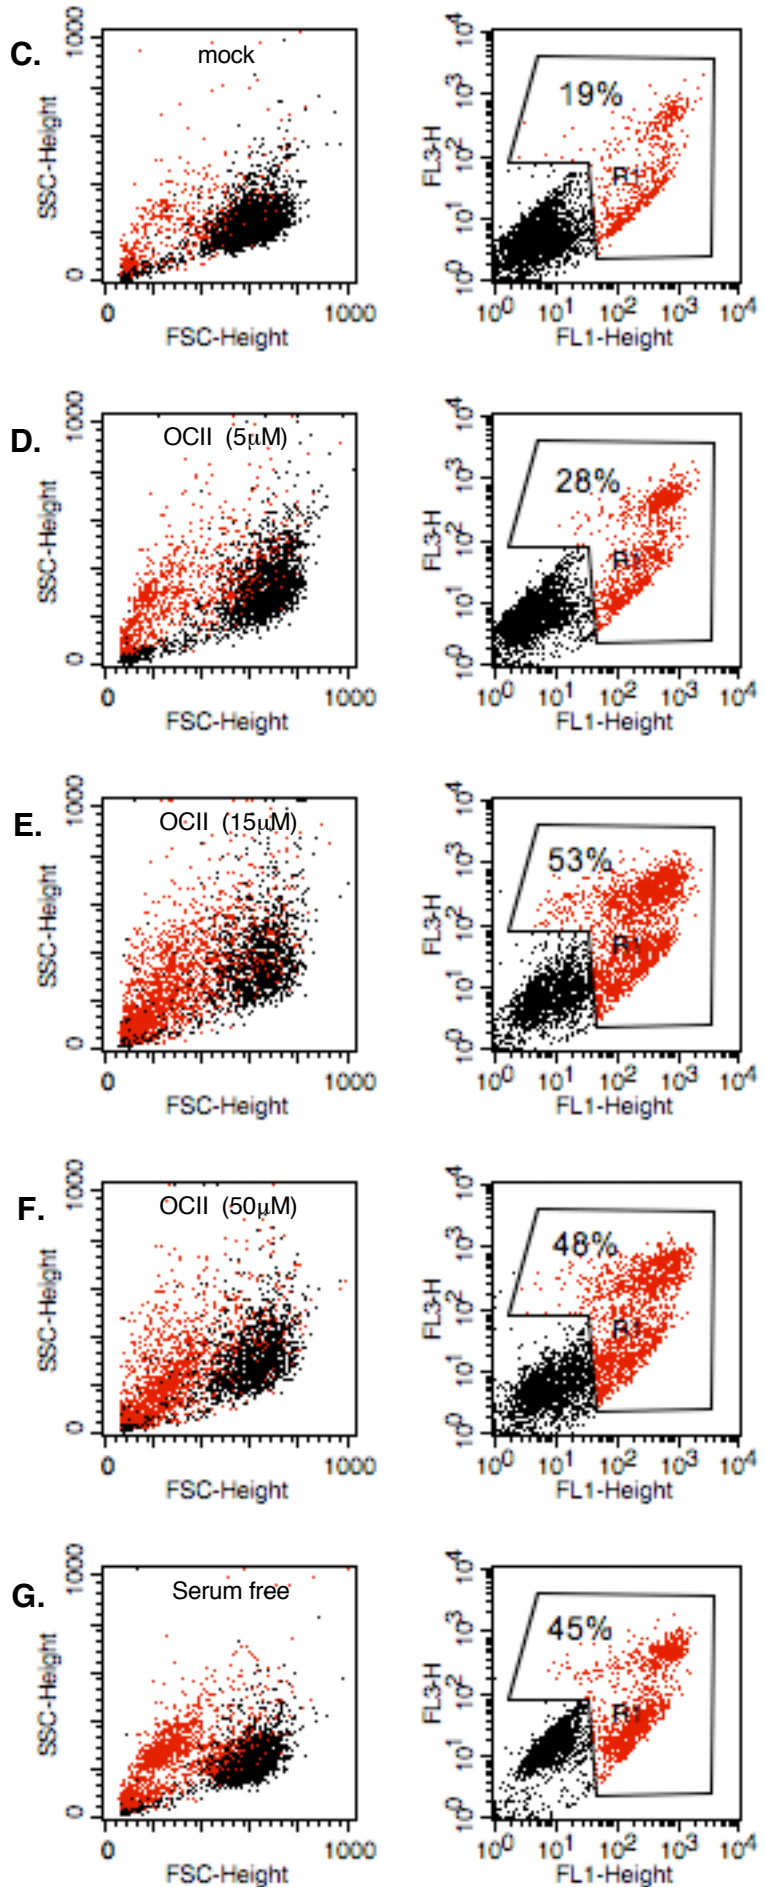

Supplement figure 3.  
HFFF (96h)

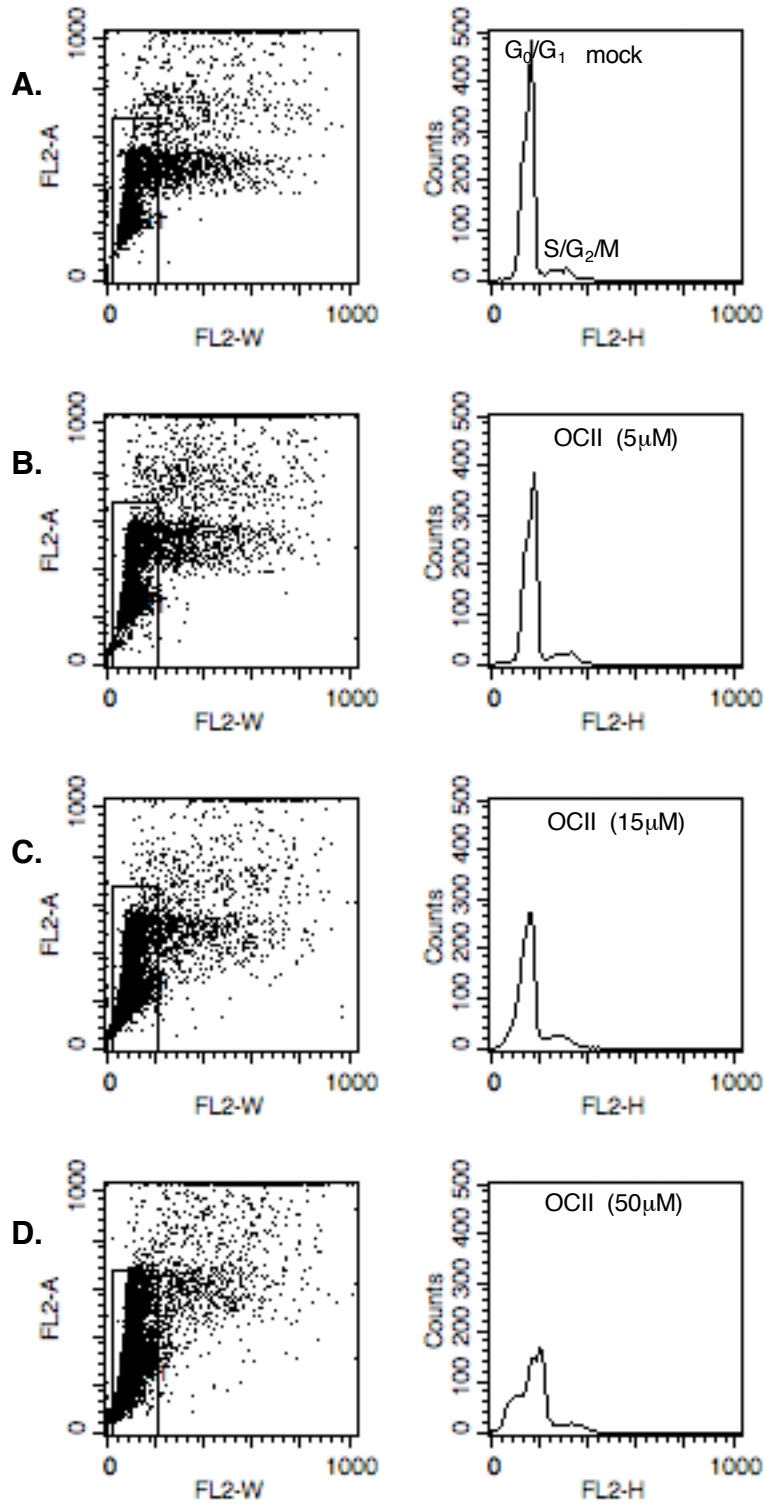

Supplement figure 4.  
A549 (48h)

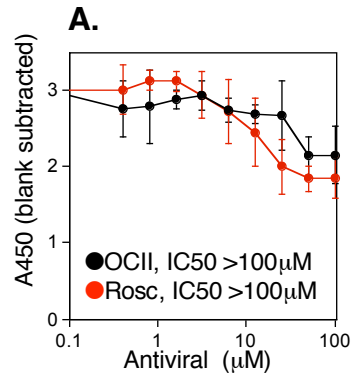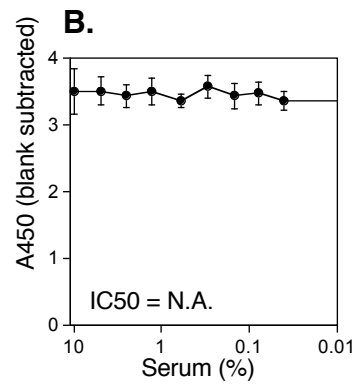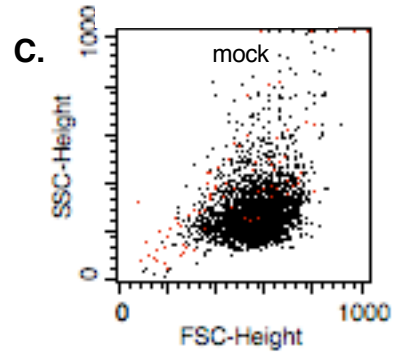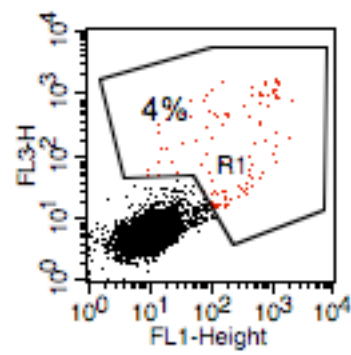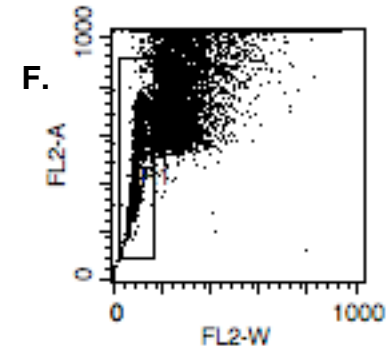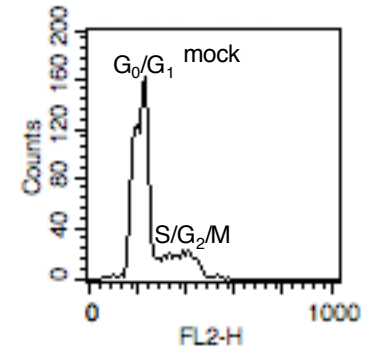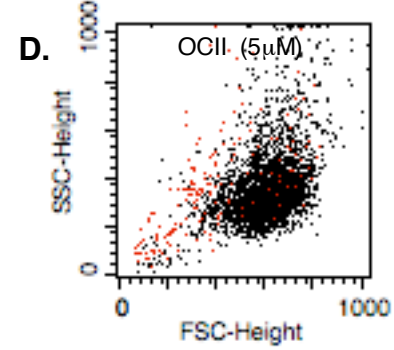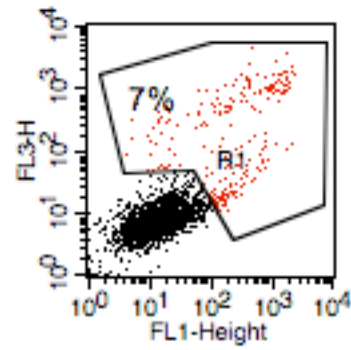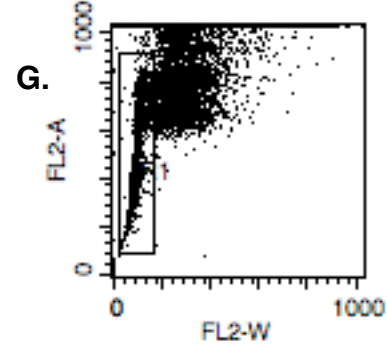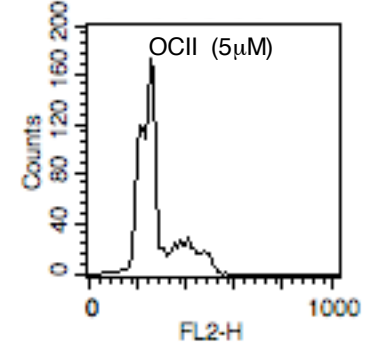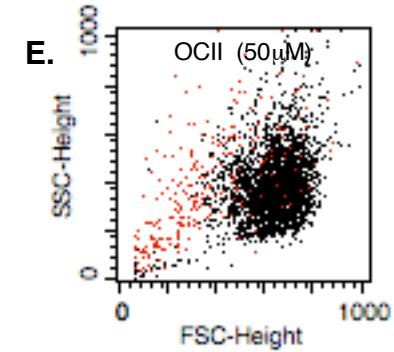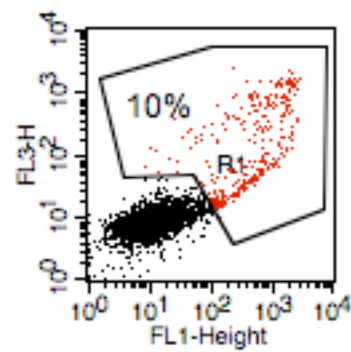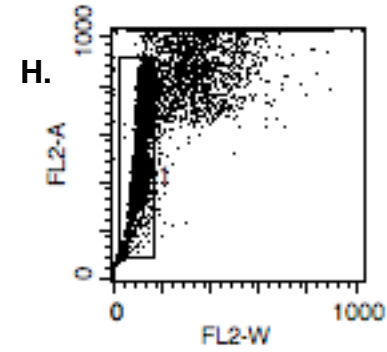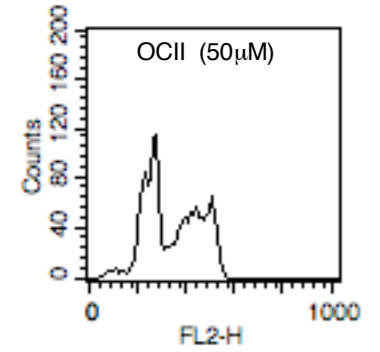

Supplement figure 5.  
A549 (96h)

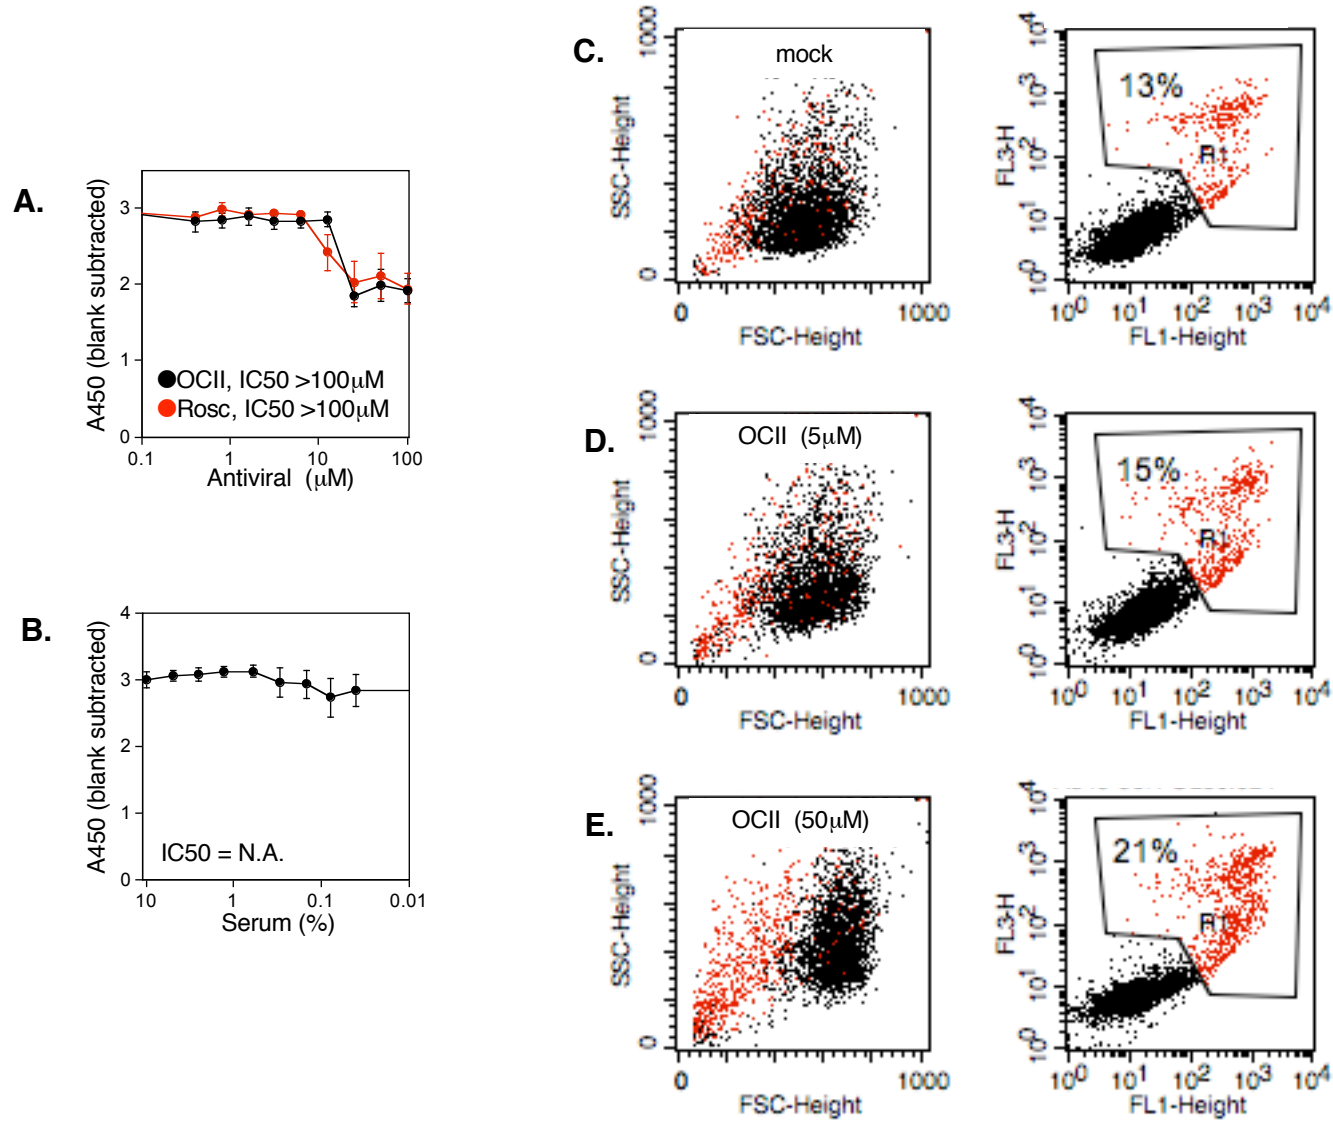

Supplement figure 6.  
A549 (96h)

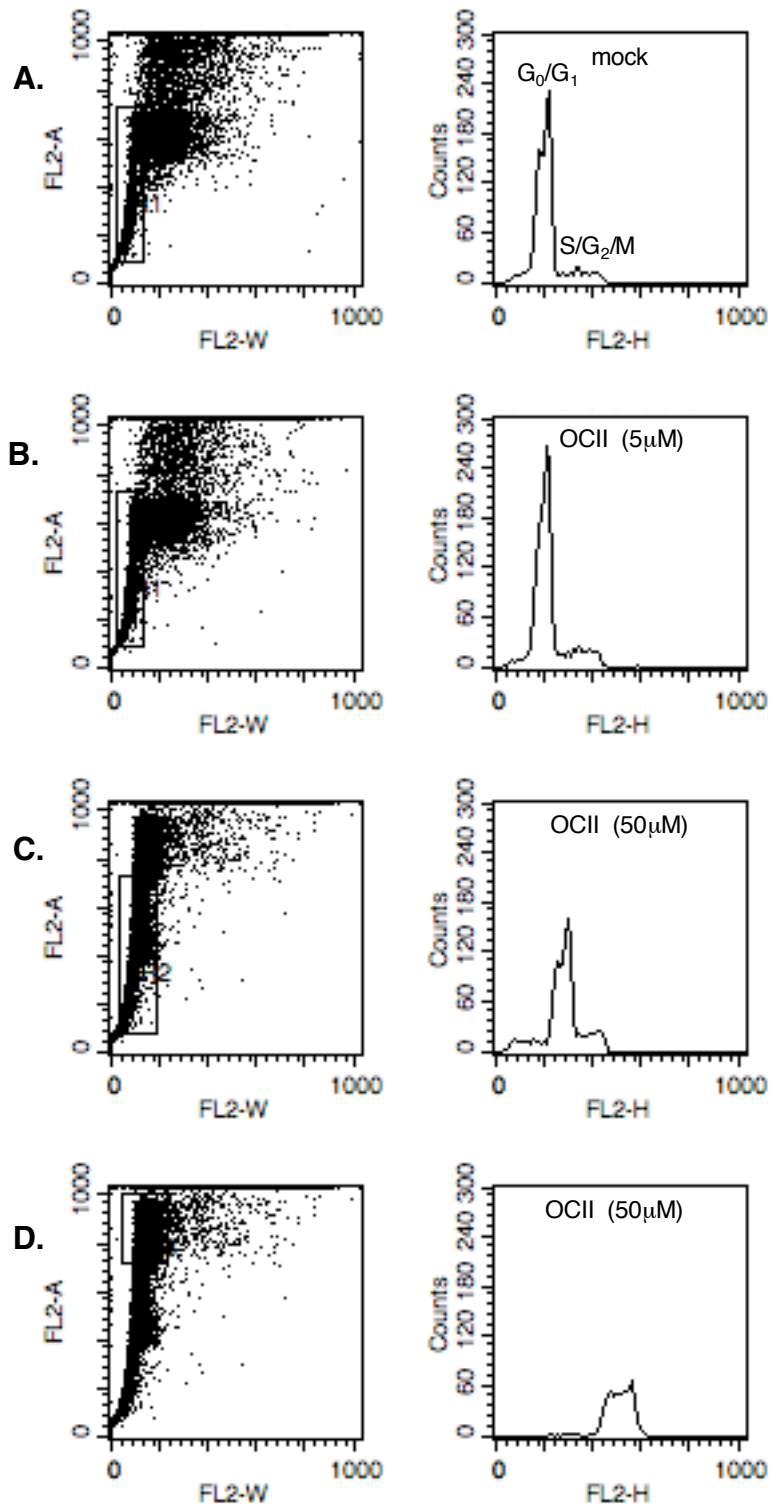

Supplement: NIHMS30926-supplement-All_Figs.pdf [file NIHMS30926-supplement-All_Figs.pdf]
